# Supplementary material for: Complete genome sequence of a novel secovirid infecting cassava in the Americas
Source: Springer Nature journal article supplement (doi:10.1007/s00705-021-05325-2), 2022-01-03
Supplement: MOESM1 [file 19990764]

# ORF1-RNA2

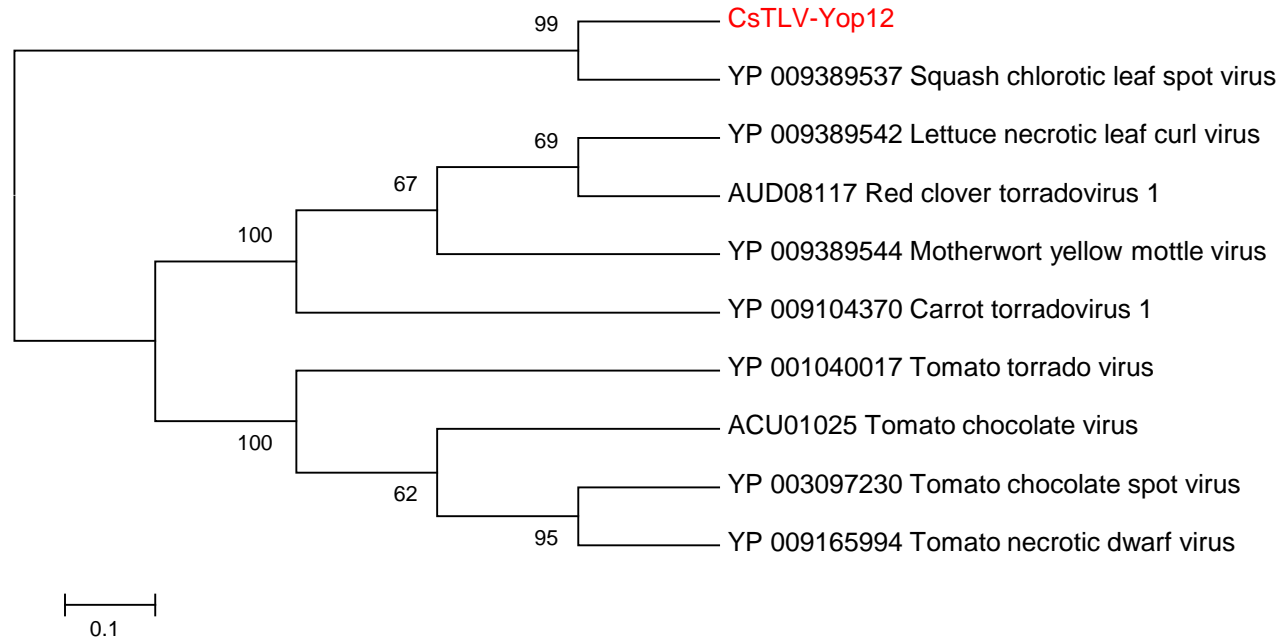

**Supplementary Figure 1.** Phylogenetic relationship of RNA2-ORF1 of CsTLV-Yop12 analyzed using MEGA. Phylogenetic tree generated using Neighbor-Joining method and aa sequences. The evolutionary distances were computed using the Poisson correction method and are in the units of the number of aa substitutions per site.
